# Supplementary material for: Oxidative Stress Mediates Anxiety-Like Behavior Induced by High Caffeine Intake in Zebrafish: Protective Effect of Alpha-Tocopherol
Source: Hindawi journal article supplement (doi:10.1155/2019/8419810), 2019-10-21
Supplement: f1 [file 8419810.f1.pdf]

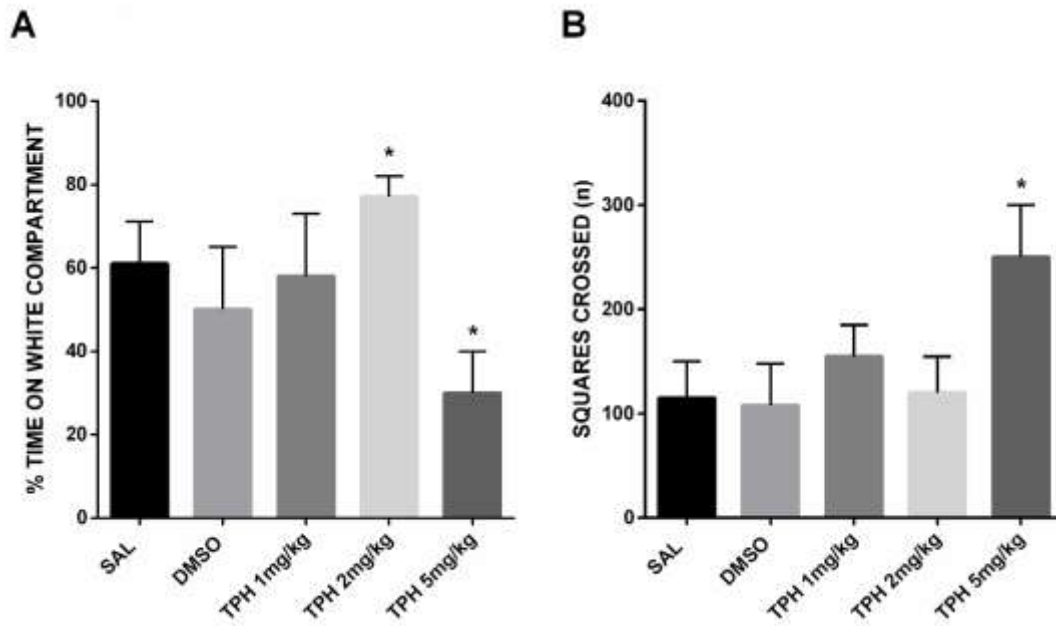

**Figure 1.** Effect of alpha-tocopherol (TPH) treatment on the zebrafish behavior. (A) Time spent in the white compartment and (B) motor activity in zebrafish treated with different doses of TPH. Data were expressed as media and standard error (ANOVA-one way followed by Tukey test, \* $p \leq 0,05$ )
